# Supplementary material for: Catalytic function of VOx/Al2O3for oxidative dehydrogenation of propane: support microstructure-dependent mass transfer and diffusion
Source: Royal Society of Chemistry journal article supplement (doi:10.1039/c8cy00564h), 2018-01-01
Supplement: c8cy00564h1.pdf [file c8cy00564h1.pdf]

**Electronic Supplementary Information**

**Catalytic function of VO<sub>x</sub>/Al<sub>2</sub>O<sub>3</sub> for oxidative  
dehydrogenation of propane: support microstructure -  
dependent mass-transfer and diffusion**

**Qun-Xing Luo,<sup>a</sup> Xiao-Kang Zhang,<sup>a</sup> Bo-Li Hou,<sup>a</sup> Jian-Gang Chen,<sup>a</sup> Chao Zhu,<sup>a</sup> Zhong-Wen Liu,<sup>a</sup> Zhao-Tie  
Liu<sup>ab\*</sup> and Jian Lu<sup>b\*</sup>**

<sup>a</sup> Key Laboratory of Applied Surface and Colloid Chemistry (Ministry of Education), School of Chemistry and  
Chemical Engineering, Shaanxi Normal University, Xi'an, 710119, China

E-mail: [ztliu@snnu.edu.cn](mailto:ztliu@snnu.edu.cn); Tel: +86-29-81530802

<sup>b</sup> College of Chemistry and Chemical Engineering, Shaanxi University of Science & Technology, Xi'an, 710021,  
China

<sup>c</sup> State Key Laboratory of Fluorine and Nitrogen Chemicals, Xi'an Modern Chemical Research Institute, Xi'an,  
710065, China

E-mail: [lujian204@263.net](mailto:lujian204@263.net); Tel: +86-29-88291213

# 1 Experimental section

## 1.1 Catalytic assessment

Catalytic assessments of  $\text{VO}_x/\text{Al}_2\text{O}_3$  catalysts in oxidative dehydrogenation of propane were performed using a lab-scale continue-flow fixed-bed reactor (stainless steel tubular of 8 mm i.d. and 300 mm length) at atmospheric pressure. The process flowchart is shown in Scheme. S1.

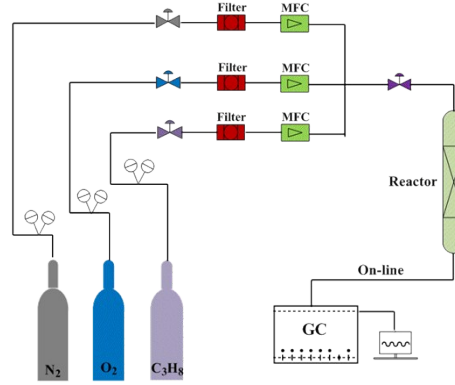

**Scheme S1.** Process flowchart toward oxidative dehydrogenation of propane reaction using continue-flow fixed-bed reactor

## 1.2 Definition

The relationship of carbon balance is shown in equation (S1), where  $F_{in}$  represents the flow-rate of feedstock, and pre-coefficient gives expression to carbon number of specific compounds, and  $C$  is the molar fraction, and  $F_{out}$  represents the flow-rate of effluents and is calculated by equation (S1).

$$F_{in} \times 3C_{in-C_3H_8} = F_{out} \times (3C_{out-C_3H_8} + C_{CO} + C_{CO_2} + C_{CH_4} + 2C_{C_2H_4} + 2C_{C_2H_6} + 3C_{C_3H_6}) \quad (S1)$$

The propane conversion and propylene selectivity were calculated by equation (S2) and (S3), respectively.

$$C_3H_8(\text{Conversion})\% = \frac{F_{in-C_3H_8} - F_{out-C_3H_8}}{F_{in-C_3H_8}} \times 100\% \quad (S2)$$

$$C_3H_6(\text{Selectivity})\% = \frac{F_{out} \times 3C_{C_3H_6}}{(F_{in-C_3H_8} - F_{out-C_3H_8}) \times 3} \times 100\% \quad (S3)$$

Surface density ( $SD$ ) of catalysts is defined as the total number of V atoms per unit square nanometer. The specific calculation is based on equation (S4), where  $x$  is vanadium loading (5 wt.%), and  $M_v$  is standard atomic weight of vanadium (50.9), and  $N_A$  is Avogadro constant ( $6.02 \times 10^{23}$ ), and  $S_{BET}$  refers to the surface area of catalyst.

$$SD = \frac{x/M_V \times N_A}{S_{BET}} \quad (S4)$$

Weight hourly space velocity (**WHSV**,  $\text{g} \cdot \text{g}^{-1} \cdot \text{h}^{-1}$ ) is defined as the quotient of the mass flow-rate of the propane divided by the mass of the catalyst ( $w_{cat}$ ) in the reactor at the condition of standard temperature and pressure (STP), as illustrated in equation (S5), where  $V_m$  is standard molar volume (22.4 mol/L).

$$WHSV = \frac{(F_{in-C_3H_8}/V_m) \times M_{C_3H_8}}{w_{cat}} \quad (S5)$$

The surface specific activity is expressed with turnover frequency ( $\text{TOF} \times 10^{23}$ ), referring to mole of propane consumed per unit V-atom and per hour ( $\text{mol}_{C_3H_8} \cdot \text{V}^{-1} \cdot \text{h}^{-1}$ ). The corresponding value is calculated by the equation S6, where **SD** is surface density.

$$TOF_{C_3H_8 \text{ consuming}} = \frac{(F_{in-C_3H_8}/V_m) \times C_3H_8(\text{conversion})}{SD \times S_{BET} \times w_{cat}} \quad (S6)$$

Reaction rates ( $\text{h}^{-1}$ ) are described as propane consuming and propylene formation rate, which refers to the total number of propane molecules consumed and total number of propylene molecules formed per unit V-atom and per hour, respectively. The specific calculation is based on equation S7 and S8, where  $N_A$  is Avogadro constant.

$$Rate_{C_3H_8 \text{ consuming}} = \frac{(F_{in-C_3H_8}/V_m) \times C_3H_8(\text{conversion}) \times N_A}{SD \times S_{BET} \times w_{cat}} = TOF_{C_3H_8 \text{ consuming}} \times N_A \quad (S7)$$

$$Rate_{C_3H_6 \text{ formation}} = \frac{(F_{in-C_3H_8}/V_m) \times C_3H_6(\text{Yield}) \times N_A}{SD \times S_{BET} \times w_{cat}} \quad (S8)$$

Space-time yield (**STY**,  $\text{g} \cdot \text{g}^{-1} \cdot \text{h}^{-1}$ ) of propylene is defined to the weight of propylene per unit weight catalyst and per hour, and is calculated by the equation (S9).

$$STY = \frac{(F_{in-C_3H_8}/V_m) \times M_{C_3H_8}}{w_{cat}} \times C_3H_6(\text{Yield}) = WHSV \times C_3H_6(\text{Yield}) \quad (S9)$$

## 2 Results

### 2.1 Effect of calcination temperature on Al<sub>2</sub>O<sub>3</sub> supports

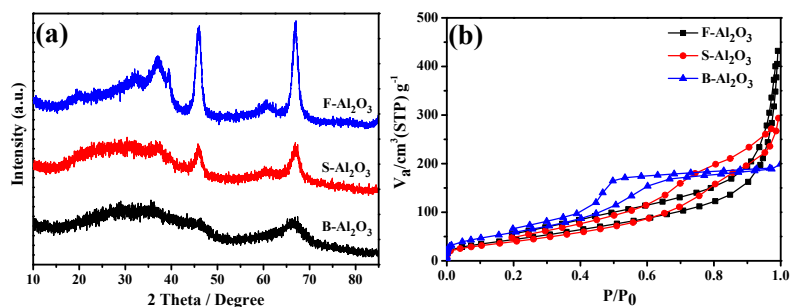

Fig. S1 Structural and textural characterization results of as-synthesized Al<sub>2</sub>O<sub>3</sub> supports at calcination temperature of 550 °C, (a) XRD patterns and (b) N<sub>2</sub> adsorption-desorption isotherm curves

Table S1 Textural properties of as-synthesized Al<sub>2</sub>O<sub>3</sub> supports at different calcination temperature

| Supports                              | Calcination temperature (°C) | $S_{\text{BET}}$ (m <sup>2</sup> ·g <sup>-1</sup> ) | $V_{\text{pore}}$ (cm <sup>3</sup> ·g <sup>-1</sup> ) | $D_{\text{pore}}$ (nm) |
|---------------------------------------|------------------------------|-----------------------------------------------------|-------------------------------------------------------|------------------------|
| F-Al <sub>2</sub> O <sub>3</sub> -500 | 500                          | 214                                                 | 0.68                                                  | 12.6                   |
|                                       | 550                          | 175                                                 | 0.64                                                  | 14.6                   |
| S-Al <sub>2</sub> O <sub>3</sub> -500 | 500                          | 150                                                 | 0.36                                                  | 9.6                    |
|                                       | 550                          | 162                                                 | 0.43                                                  | 10.7                   |
| B-Al <sub>2</sub> O <sub>3</sub> -500 | 500                          | 257                                                 | 0.29                                                  | 4.6                    |
|                                       | 550                          | 242                                                 | 0.30                                                  | 5.0                    |

To give a reliable explanation why the textural properties of catalysts are different from those of supports, we prepared all Al<sub>2</sub>O<sub>3</sub> supports at calcination temperature of 550 °C. The resulting as-prepared Al<sub>2</sub>O<sub>3</sub> supports were characterized by XRD and N<sub>2</sub> physical adsorption-desorption, as shown in Fig. S1. The corresponding surface area, pore size and volume were listed in Table S1. Compared with those Al<sub>2</sub>O<sub>3</sub> supports prepared at 500 °C, it is found that increasing calcination temperature almost have no effect on crystalline structure of Al<sub>2</sub>O<sub>3</sub> support, but has a slight effect on textural properties.

## 2.2 Product distribution and carbon balance

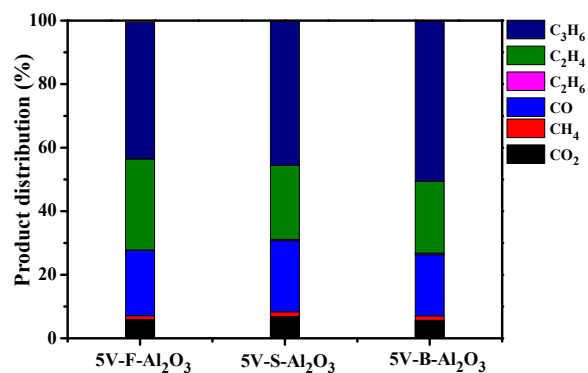

Fig. S2 Product distribution of ODHP reaction over 5V-M-Al<sub>2</sub>O<sub>3</sub> catalysts, reaction condition:  $m_{\text{cat}}=0.1$  g, WHSV=9.43 g·g<sub>cat</sub><sup>-1</sup>·h<sup>-1</sup>,  $T=530$  °C

## 2.3 Catalyst stability

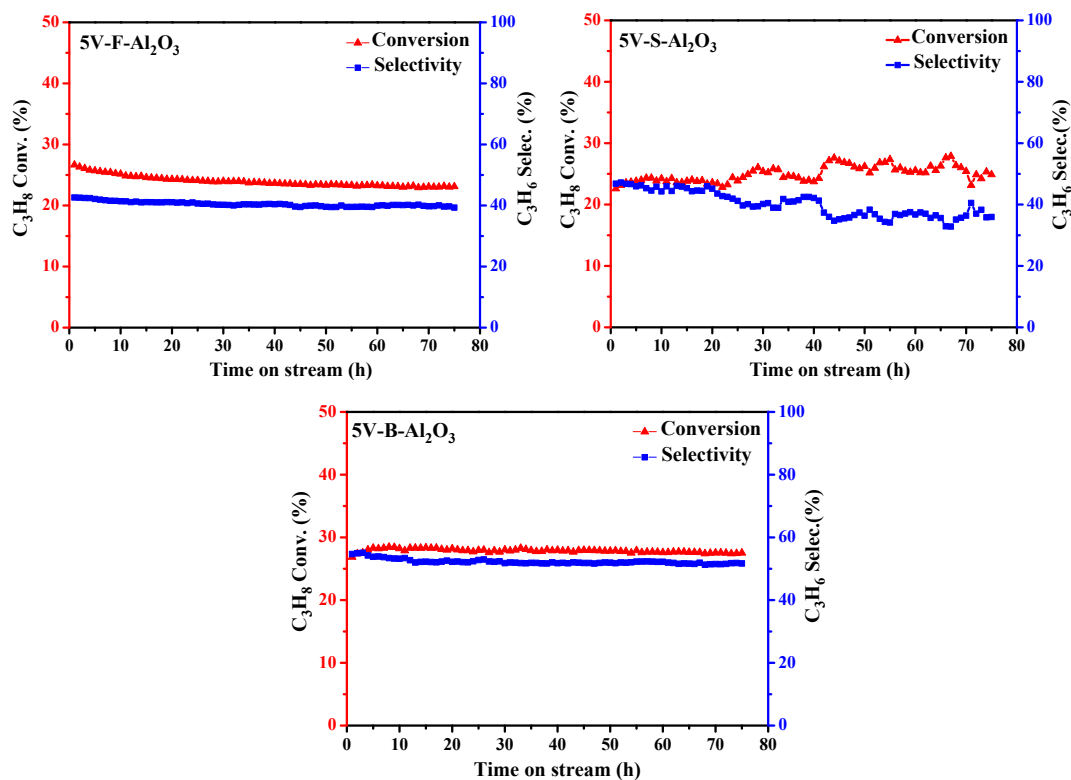

Fig. S3 Catalyst stability of 5V-M-Al<sub>2</sub>O<sub>3</sub> catalysts for ODHP reaction, reaction condition:  $m_{\text{cat}}=0.1$  g, WHSV=9.43 g·g<sub>cat</sub><sup>-1</sup>·h<sup>-1</sup>,  $T=530$  °C
